# Supplementary material for: Insight into Conformational Change for 14-3-3σ Protein by Molecular Dynamics Simulation
Source: Int J Mol Sci. 2014 Feb 18;15(2):2794–810. doi: 10.3390/ijms15022794 (PMC3958882; doi:10.3390/ijms15022794)
Supplement: Supplementary file 1 [file ijms-15-02794-s001.pdf]

## Supplementary Information

**Table S1.** Hydrogen bonds formed between the phosphorylated residues and 14-3-3 $\sigma$  protein.

| Donor   | Acceptor        | %Occupancy | Distance (Å)    | Angle (°)          |
|---------|-----------------|------------|-----------------|--------------------|
| Sep-O1P | Arg56-HH12-NH1  | 70.57      | $3.13 \pm 0.25$ | $141.42 \pm 13.17$ |
| Sep-O1P | Arg56-HH22-NH2  | 93.80      | $2.86 \pm 0.16$ | $160.09 \pm 11.37$ |
| Sep-O1P | Arg129-HH12-NH1 | 99.92      | $2.78 \pm 0.11$ | $164.72 \pm 7.93$  |
| Sep-O1P | Arg129-HH22-NH2 | 21.35      | $3.37 \pm 0.11$ | $129.25 \pm 4.98$  |
| Sep-O2P | Lys49-HZ1-NZ    | 11.52      | $3.19 \pm 0.21$ | $140.32 \pm 13.13$ |
| Sep-O2P | Lys49-HZ2-NZ    | 12.10      | $3.19 \pm 0.21$ | $139.95 \pm 12.93$ |
| Sep-O2P | Lys49-HZ3-NZ    | 10.40      | $3.20 \pm 0.22$ | $140.32 \pm 13.62$ |
| Sep-O2P | Arg129-HH12-NH1 | 36.25      | $3.35 \pm 0.12$ | $131.27 \pm 5.77$  |
| Sep-O2P | Arg129-HH22-NH2 | 100.00     | $2.78 \pm 0.10$ | $166.27 \pm 7.12$  |
| Sep-O2P | Tyr130-HH-OH    | 99.98      | $2.68 \pm 0.12$ | $166.08 \pm 7.28$  |
| Sep-O3P | Lys49-HZ1-NZ    | 29.50      | $2.80 \pm 0.14$ | $149.35 \pm 13.42$ |
| Sep-O3P | Lys49-HZ2-NZ    | 32.70      | $2.80 \pm 0.13$ | $149.85 \pm 13.52$ |
| Sep-O3P | Lys49-HZ3-NZ    | 29.23      | $2.80 \pm 0.13$ | $149.89 \pm 13.89$ |
| Sep-O3P | Arg56-HH12-NH1  | 89.45      | $2.96 \pm 0.19$ | $156.27 \pm 12.81$ |
| Sep-O3P | Arg56-HH22-NH2  | 5.35       | $3.42 \pm 0.07$ | $130.61 \pm 5.57$  |
| Ter-OXT | Arg56-HH12-NH1  | 98.35      | $2.81 \pm 0.12$ | $156.62 \pm 11.78$ |
| Ter-OXT | Arg56-HH22-NH2  | 41.70      | $3.20 \pm 0.21$ | $135.19 \pm 8.74$  |
| Ter-O   | Arg56-HH12-NH1  | 49.70      | $3.21 \pm 0.19$ | $139.52 \pm 9.94$  |
| Ter-O   | Arg56-HH22-NH2  | 94.85      | $2.92 \pm 0.17$ | $159.57 \pm 10.33$ |
| Ter-O   | Arg129-HH12-NH1 | 95.30      | $2.88 \pm 0.16$ | $153.88 \pm 10.93$ |

**Figure S1.** The apo-14-3-3 $\sigma$  (colored in cyan) structure superimposed with the bound 14-3-3 $\sigma$  (colored in red) structure. The protein is shown in cartoon representation, and the phosphopeptide is shown in ball and stick representation. The nine helices in monomer A are labeled.

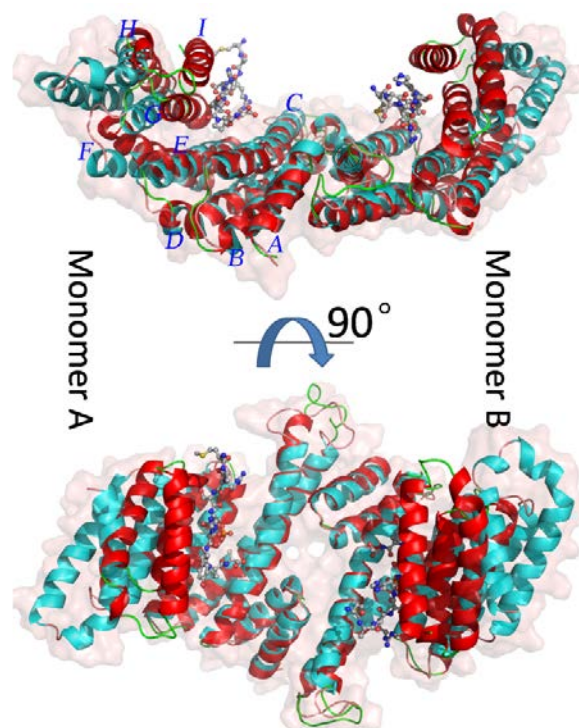

**Figure S2.** (a) The distances between the mass center of the helices G, H and I for both monomers as a function of MD simulation time. The slopes of the linear regression lines are  $7.05 \times 10^{-7}$  and  $-8.52 \times 10^{-6}$  Å/ps; (b) The distances between the mass center of the helices A to D in the both monomers and the mass center of the helices G, H and I as a function of MD simulation time for bound 14-3-3σ; as well as (c) for apo-14-3-3σ.

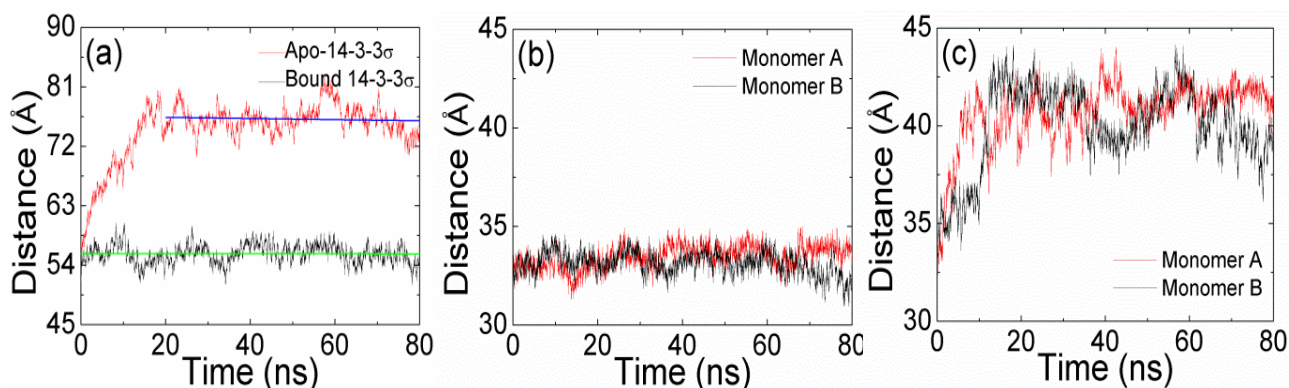

**Figure S3.** Evolution of DSSP as a function of the MD simulation time for (a) apo-14-3-3σ and (b) bound 14-3-3σ, respectively. (0 for none, 1 for parallel beta-sheet, 2 for anti-parallel beta-sheet, 3 for 3–10 helix, 4 for alpha helix, 5 for Pi (3–14) helix and 6 for turn).

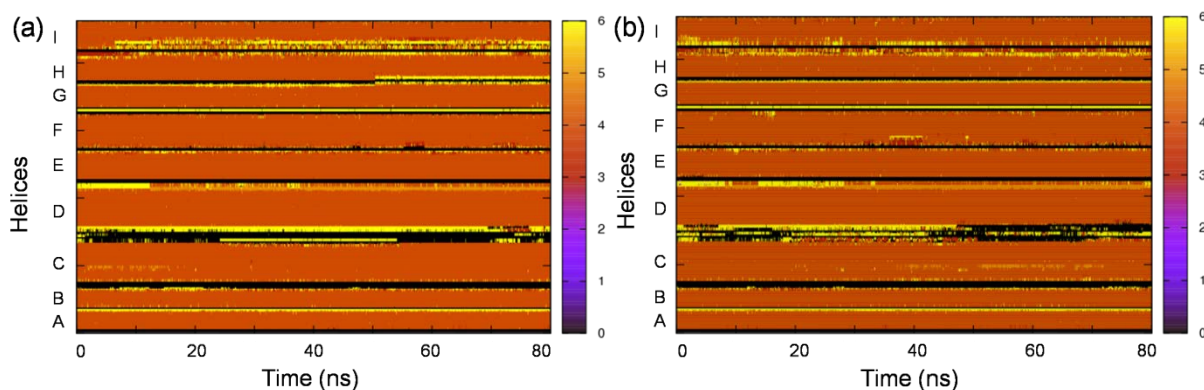

**Figure S4.** RMSDs of backbone atoms as a function of the MD simulation time. (a) is for the helices A, B, C and D; and (b) is for helices G, H and I.

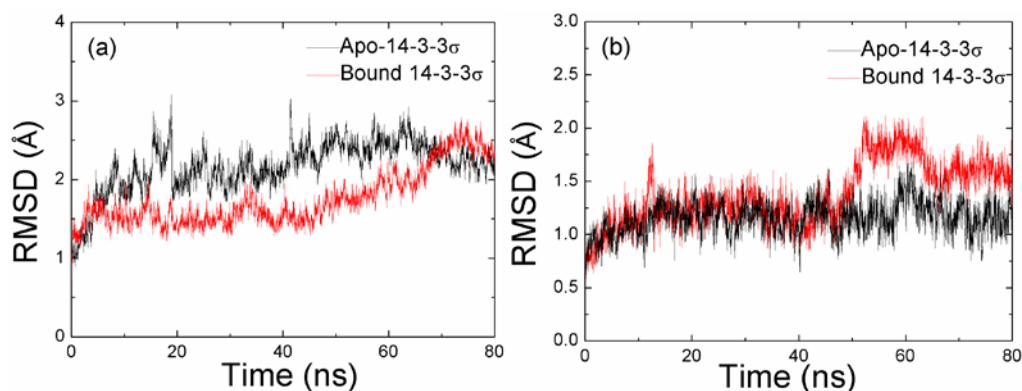

**Figure S5.** (a) RMSDs of backbone atoms of the helices E, F and G as a function of the MD simulation time; (b) Distances tracked through MD simulation between the mass center of helices E and G.

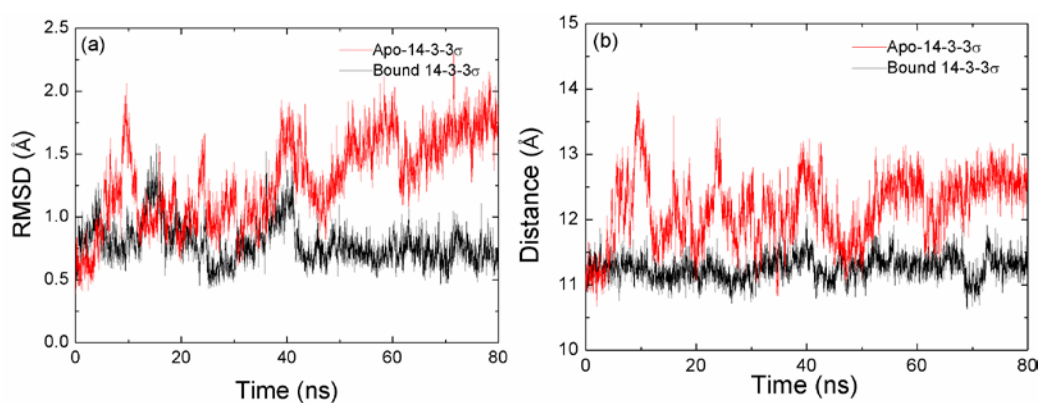

© 2014 by the authors; licensee MDPI, Basel, Switzerland. This article is an open access article distributed under the terms and conditions of the Creative Commons Attribution license (<http://creativecommons.org/licenses/by/3.0/>).
